# Supplementary material for: Influence of temperature on molecular interactions of imidazolium-based ionic liquids with acetophenone: thermodynamic properties and quantum chemical studies
Source: Royal Society of Chemistry journal article supplement (doi:10.1039/c6ra15476j), 2016-01-01
Supplement: c6ra15476j1.pdf [file c6ra15476j1.pdf]

## Supporting Material

**Table 1S**

Mole fraction ( $x_1$ ), density ( $\rho$ ), sound velocity ( $u$ ), viscosity ( $\eta$ ), refractive index ( $n_D$ ), excess molar volumes ( $V_m^E$ ), deviation in isentropic Compressibility ( $\Delta\kappa_s$ ), deviation in viscosity ( $\Delta\eta$ ), and deviation in refractive index ( $\Delta n_D$ ) for the binary mixture of acetophenone with [BMIM]<sup>+</sup>[BF<sub>4</sub>]<sup>-</sup> or [BMIM]<sup>+</sup>[PF<sub>6</sub>]<sup>-</sup> or [EMIM]<sup>+</sup>[BF<sub>4</sub>]<sup>-</sup> or [EMIM]<sup>+</sup>[EtSO<sub>4</sub>]<sup>-</sup> at (293.15, 303.15, 313.15, 323.15 and 333.15) K and at pressure  $p = 0.1$  MPa.

| $x_1$                                                                                    | $\rho/\text{g}\cdot\text{cm}^{-3}$ | $u/\text{m}\cdot\text{s}^{-1}$ | $\eta/\text{mPa}\cdot\text{s}$ | $n_D$ | $V_m^E/\text{cm}^3\text{mol}^{-1}$ | $\Delta\kappa_s/\text{TPa}^{-1}$ | $\Delta\eta/\text{mPa}\cdot\text{s}$ | $\Delta n_D$ |
|------------------------------------------------------------------------------------------|------------------------------------|--------------------------------|--------------------------------|-------|------------------------------------|----------------------------------|--------------------------------------|--------------|
| {[BMIM] <sup>+</sup> [BF <sub>4</sub> ] <sup>-</sup> ( $x_1$ ) + acetophenone ( $x_2$ )} |                                    |                                |                                |       |                                    |                                  |                                      |              |
| $T = 293.15$ K                                                                           |                                    |                                |                                |       |                                    |                                  |                                      |              |
| 0.0000                                                                                   | 1.02789                            | 1497                           | 1.91                           | 1.533 | 0.000                              | 00000                            | 0.000                                | 0.0000       |
| 0.0484                                                                                   | 1.03478                            | 1506                           | 7.00                           | 1.526 | 0.755                              | 16482                            | -1.275                               | -0.0020      |
| 0.0974                                                                                   | 1.04295                            | 1513                           | 11.77                          | 1.518 | 1.320                              | 26452                            | -2.948                               | -0.0043      |
| 0.1946                                                                                   | 1.05663                            | 1524                           | 22.32                          | 1.501 | 2.572                              | 41628                            | -5.162                               | -0.0103      |
| 0.2935                                                                                   | 1.07013                            | 1533                           | 26.01                          | 1.488 | 3.691                              | 49673                            | -14.469                              | -0.0132      |
| 0.3921                                                                                   | 1.08464                            | 1542                           | 29.49                          | 1.475 | 4.457                              | 56572                            | -23.943                              | -0.0145      |
| 0.4936                                                                                   | 1.10127                            | 1551                           | 34.38                          | 1.464 | 4.794                              | 59273                            | -32.389                              | -0.0143      |
| 0.6024                                                                                   | 1.12268                            | 1561                           | 41.70                          | 1.454 | 4.383                              | 57523                            | -39.366                              | -0.0129      |
| 0.6940                                                                                   | 1.14033                            | 1568                           | 42.42                          | 1.447 | 3.882                              | 53135                            | -50.687                              | -0.0097      |
| 0.7954                                                                                   | 1.15977                            | 1572                           | 43.58                          | 1.442 | 3.127                              | 40687                            | -62.838                              | -0.0038      |
| 0.8999                                                                                   | 1.18422                            | 1578                           | 55.66                          | 1.437 | 1.451                              | 22891                            | -64.488                              | 0.0025       |
| 0.9487                                                                                   | 1.19404                            | 1578                           | 78.88                          | 1.432 | 0.836                              | 12038                            | -47.696                              | 0.0036       |
| 1.0000                                                                                   | 1.20524                            | 1579                           | 133.31                         | 1.423 | 0.000                              | 00000                            | 0.000                                | 0.0000       |
| $T = 303.15$ K                                                                           |                                    |                                |                                |       |                                    |                                  |                                      |              |
| 0.0000                                                                                   | 1.01917                            | 1460                           | 1.65                           | 1.528 | 0.000                              | 00000                            | 0.000                                | 0.0000       |
| 0.0484                                                                                   | 1.02607                            | 1469                           | 5.00                           | 1.522 | 0.777                              | 14622                            | -0.319                               | -0.0012      |
| 0.0974                                                                                   | 1.03423                            | 1477                           | 8.04                           | 1.514 | 1.362                              | 25712                            | -1.002                               | -0.0033      |
| 0.1946                                                                                   | 1.04791                            | 1489                           | 11.65                          | 1.498 | 2.656                              | 39691                            | -4.756                               | -0.0094      |
| 0.2935                                                                                   | 1.06141                            | 1500                           | 13.72                          | 1.484 | 3.814                              | 49081                            | -10.184                              | -0.0127      |
| 0.3921                                                                                   | 1.07593                            | 1510                           | 16.94                          | 1.472 | 4.615                              | 55348                            | -14.440                              | -0.0139      |
| 0.4936                                                                                   | 1.09255                            | 1520                           | 21.29                          | 1.461 | 4.981                              | 58753                            | -17.785                              | -0.0136      |
| 0.6024                                                                                   | 1.11397                            | 1531                           | 25.87                          | 1.451 | 4.589                              | 56119                            | -21.453                              | -0.0118      |
| 0.6940                                                                                   | 1.13161                            | 1539                           | 28.63                          | 1.444 | 4.102                              | 51380                            | -25.638                              | -0.0090      |
| 0.7954                                                                                   | 1.15106                            | 1544                           | 30.80                          | 1.439 | 3.360                              | 38259                            | -31.156                              | -0.0033      |
| 0.8999                                                                                   | 1.17550                            | 1551                           | 38.61                          | 1.434 | 1.685                              | 19729                            | -31.267                              | 0.0031       |
| 0.9487                                                                                   | 1.18532                            | 1552                           | 50.37                          | 1.430 | 1.073                              | 9890                             | -23.210                              | 0.0038       |
| 1.0000                                                                                   | 1.19804                            | 1555                           | 77.46                          | 1.421 | 0.000                              | 0000                             | 0.000                                | 0.0000       |
| $T = 313.15$ K                                                                           |                                    |                                |                                |       |                                    |                                  |                                      |              |
| 0.0000                                                                                   | 1.01043                            | 1423                           | 1.37                           | 1.523 | 0.000                              | 00000                            | 0.000                                | 0.0000       |
| 0.0484                                                                                   | 1.01733                            | 1432                           | 3.65                           | 1.518 | 0.801                              | 12573                            | -0.029                               | -0.0007      |
| 0.0974                                                                                   | 1.02549                            | 1441                           | 5.67                           | 1.510 | 1.407                              | 23127                            | -0.346                               | -0.0026      |
| 0.1946                                                                                   | 1.03917                            | 1455                           | 7.13                           | 1.494 | 2.745                              | 38972                            | -3.517                               | -0.0088      |
| 0.2935                                                                                   | 1.05380                            | 1467                           | 8.33                           | 1.480 | 3.792                              | 46403                            | -7.039                               | -0.0124      |

|                                                                                                          |         |      |        |       |       |         |         |         |
|----------------------------------------------------------------------------------------------------------|---------|------|--------|-------|-------|---------|---------|---------|
| 0.3921                                                                                                   | 1.06719 | 1477 | 9.85   | 1.469 | 4.783 | 53696   | -10.213 | -0.0130 |
| 0.4936                                                                                                   | 1.08381 | 1488 | 10.79  | 1.459 | 5.180 | 55918   | -14.119 | -0.0125 |
| 0.6024                                                                                                   | 1.10523 | 1501 | 11.83  | 1.449 | 4.809 | 54955   | -18.261 | -0.0110 |
| 0.6940                                                                                                   | 1.12287 | 1510 | 16.90  | 1.442 | 4.339 | 49014   | -17.565 | -0.0079 |
| 0.7954                                                                                                   | 1.14232 | 1516 | 18.98  | 1.437 | 3.613 | 35020   | -20.317 | -0.0021 |
| 0.8999                                                                                                   | 1.16676 | 1524 | 21.57  | 1.432 | 1.941 | 15285   | -22.713 | 0.0034  |
| 0.9487                                                                                                   | 1.17658 | 1527 | 30.48  | 1.427 | 1.333 | 8799    | -16.127 | 0.0037  |
| 1.0000                                                                                                   | 1.19092 | 1532 | 49.05  | 1.418 | 0.000 | 0000    | 0.000   | 0.0000  |
| $T = 323.15 \text{ K}$                                                                                   |         |      |        |       |       |         |         |         |
| 0.0000                                                                                                   | 1.00167 | 1387 | 1.17   | 1.519 | 0.000 | 00000   | 0.000   | 0.0000  |
| 0.0484                                                                                                   | 1.00865 | 1396 | 2.80   | 1.513 | 0.816 | 10900   | 0.093   | -0.0006 |
| 0.0974                                                                                                   | 1.01673 | 1406 | 3.81   | 1.506 | 1.454 | 21532   | -0.454  | -0.0024 |
| 0.1946                                                                                                   | 1.03041 | 1421 | 4.79   | 1.491 | 2.839 | 36294.2 | -2.567  | -0.0078 |
| 0.2935                                                                                                   | 1.04504 | 1433 | 5.43   | 1.476 | 3.929 | 43176   | -5.069  | -0.0118 |
| 0.3921                                                                                                   | 1.05843 | 1445 | 6.54   | 1.466 | 4.961 | 50440   | -7.095  | -0.0120 |
| 0.4936                                                                                                   | 1.07505 | 1458 | 7.62   | 1.456 | 5.392 | 53960   | -9.245  | -0.0118 |
| 0.6024                                                                                                   | 1.09646 | 1472 | 9.74   | 1.446 | 5.045 | 52477   | -10.587 | -0.0100 |
| 0.6940                                                                                                   | 1.11411 | 1482 | 12.22  | 1.440 | 4.592 | 47193   | -11.022 | -0.0071 |
| 0.7954                                                                                                   | 1.13356 | 1489 | 13.65  | 1.435 | 3.884 | 32931   | -12.809 | -0.0012 |
| 0.8999                                                                                                   | 1.15797 | 1498 | 15.40  | 1.429 | 2.222 | 13208   | -14.390 | 0.0036  |
| 0.9487                                                                                                   | 1.16779 | 1501 | 20.37  | 1.425 | 1.619 | 4659    | -10.974 | 0.0042  |
| 1.0000                                                                                                   | 1.18387 | 1509 | 32.97  | 1.415 | 0.000 | 00000   | 0.000   | 0.0000  |
| $T = 333.15 \text{ K}$                                                                                   |         |      |        |       |       |         |         |         |
| 0.0000                                                                                                   | 0.99281 | 1352 | 1.02   | 1.514 | 0.000 | 0.0     | 0.000   | 0.0000  |
| 0.0484                                                                                                   | 0.99970 | 1361 | 2.22   | 1.508 | 0.854 | 9474    | 0.124   | -0.0004 |
| 0.0974                                                                                                   | 1.00787 | 1370 | 3.23   | 1.502 | 1.506 | 18307   | 0.035   | -0.0021 |
| 0.1946                                                                                                   | 1.02549 | 1390 | 4.54   | 1.487 | 2.412 | 34822   | -0.812  | -0.0069 |
| 0.2935                                                                                                   | 1.03617 | 1401 | 4.82   | 1.474 | 4.077 | 40383   | -2.741  | -0.0105 |
| 0.3921                                                                                                   | 1.04957 | 1413 | 5.66   | 1.463 | 5.156 | 47161   | -4.096  | -0.0116 |
| 0.4936                                                                                                   | 1.06619 | 1427 | 6.22   | 1.453 | 5.623 | 50190   | -5.802  | -0.0107 |
| 0.6024                                                                                                   | 1.08760 | 1443 | 6.73   | 1.444 | 5.303 | 50738   | -7.715  | -0.0089 |
| 0.6940                                                                                                   | 1.10525 | 1454 | 9.21   | 1.438 | 4.872 | 45314   | -7.270  | -0.0061 |
| 0.7954                                                                                                   | 1.12470 | 1462 | 10.25  | 1.433 | 4.184 | 28044   | -8.497  | -0.0004 |
| 0.8999                                                                                                   | 1.14914 | 1472 | 11.48  | 1.427 | 2.525 | 10415   | -9.590  | 0.0041  |
| 0.9487                                                                                                   | 1.15896 | 1477 | 12.85  | 1.422 | 1.929 | 4453    | -9.309  | 0.0045  |
| 1.0000                                                                                                   | 1.17689 | 1487 | 23.30  | 1.413 | 0.000 | 0.0     | 0.000   | 0.0000  |
| {[BMIM] <sup>+</sup> [PF <sub>6</sub> ] <sup>-</sup> (x <sub>1</sub> ) + acetophenone (x <sub>2</sub> )} |         |      |        |       |       |         |         |         |
| $T = 293.15 \text{ K}$                                                                                   |         |      |        |       |       |         |         |         |
| 0.0000                                                                                                   | 1.02789 | 1497 | 1.91   | 1.533 | 0.000 | 00000   | 0.000   | 0.0000  |
| 0.0500                                                                                                   | 1.05497 | 1510 | 8.38   | 1.526 | 0.258 | -10397  | -8.116  | -0.0068 |
| 0.0998                                                                                                   | 1.08062 | 1523 | 16.17  | 1.518 | 0.428 | -14397  | -14.840 | -0.0132 |
| 0.2001                                                                                                   | 1.11990 | 1545 | 28.17  | 1.502 | 1.626 | -10469  | -32.087 | -0.0251 |
| 0.3030                                                                                                   | 1.15002 | 1565 | 35.57  | 1.486 | 3.425 | 6873    | -54.677 | -0.0326 |
| 0.4001                                                                                                   | 1.17490 | 1583 | 49.32  | 1.473 | 5.075 | 27359   | -69.216 | -0.0361 |
| 0.5027                                                                                                   | 1.19969 | 1598 | 59.76  | 1.461 | 6.569 | 42027   | -88.713 | -0.0360 |
| 0.6092                                                                                                   | 1.23012 | 1615 | 73.27  | 1.450 | 6.968 | 50806   | -106.25 | -0.0325 |
| 0.7001                                                                                                   | 1.25693 | 1626 | 80.80  | 1.444 | 6.800 | 51349   | -125.21 | -0.0268 |
| 0.8017                                                                                                   | 1.28984 | 1636 | 88.37  | 1.437 | 5.770 | 42482   | -147.27 | -0.0191 |
| 0.9087                                                                                                   | 1.32901 | 1646 | 128.92 | 1.429 | 3.556 | 25842   | -137.91 | -0.0095 |
| 0.9496                                                                                                   | 1.34582 | 1649 | 176.23 | 1.424 | 2.314 | 14836   | -102.51 | -0.0055 |
| 1.0000                                                                                                   | 1.37116 | 1655 | 293.44 | 1.411 | 0.000 | 00000   | 0.000   | 0.0000  |
| $T = 303.15 \text{ K}$                                                                                   |         |      |        |       |       |         |         |         |
| 0.0000                                                                                                   | 1.01917 | 1460 | 1.65   | 1.528 | 0.000 | 00000   | 0.000   | 0.0000  |
| 0.0500                                                                                                   | 1.04625 | 1473 | 4.64   | 1.521 | 0.258 | -10397  | -5.033  | -0.0013 |
| 0.0998                                                                                                   | 1.07191 | 1486 | 7.66   | 1.512 | 0.428 | -14398  | -9.996  | -0.0037 |
| 0.2001                                                                                                   | 1.11118 | 1509 | 14.34  | 1.497 | 1.642 | -10470  | -19.409 | -0.0074 |
| 0.3030                                                                                                   | 1.14130 | 1529 | 18.50  | 1.481 | 3.469 | 6873    | -31.745 | -0.0104 |

|                                                                                                          |         |      |        |       |        |        |         |         |
|----------------------------------------------------------------------------------------------------------|---------|------|--------|-------|--------|--------|---------|---------|
| 0.4001                                                                                                   | 1.16619 | 1547 | 22.93  | 1.468 | 5.146  | 27360  | -42.875 | -0.0121 |
| 0.5027                                                                                                   | 1.19098 | 1565 | 32.38  | 1.456 | 6.665  | 42027  | -49.894 | -0.0120 |
| 0.6092                                                                                                   | 1.22141 | 1583 | 40.88  | 1.445 | 7.076  | 50806  | -58.465 | -0.0100 |
| 0.7001                                                                                                   | 1.24821 | 1596 | 45.05  | 1.439 | 6.911  | 51350  | -68.870 | -0.0054 |
| 0.8017                                                                                                   | 1.28112 | 1607 | 48.50  | 1.432 | 5.875  | 42482  | -81.711 | 0.0001  |
| 0.9087                                                                                                   | 1.32030 | 1617 | 67.92  | 1.424 | 3.641  | 25843  | -79.459 | 0.0051  |
| 0.9496                                                                                                   | 1.33710 | 1622 | 88.86  | 1.419 | 2.387  | 14837  | -65.067 | 0.0049  |
| 1.0000                                                                                                   | 1.36277 | 1630 | 162.01 | 1.408 | 0.000  | 00000  | 0.000   | 0.0000  |
| $T = 313.15 \text{ K}$                                                                                   |         |      |        |       |        |        |         |         |
| 0.0000                                                                                                   | 1.01043 | 1423 | 1.37   | 1.523 | 0.000  | 00000  | 0.000   | 0.0000  |
| 0.0500                                                                                                   | 1.03751 | 1435 | 3.57   | 1.517 | 0.258  | -11280 | -2.610  | -0.0009 |
| 0.0998                                                                                                   | 1.06317 | 1449 | 5.62   | 1.508 | 0.428  | -16335 | -5.339  | -0.0033 |
| 0.2001                                                                                                   | 1.10244 | 1473 | 8.03   | 1.493 | 1.660  | -12460 | -12.556 | -0.0068 |
| 0.3030                                                                                                   | 1.13256 | 1494 | 12.30  | 1.478 | 3.516  | 257    | -18.161 | -0.0096 |
| 0.4001                                                                                                   | 1.15745 | 1514 | 16.51  | 1.465 | 5.221  | 18487  | -23.266 | -0.0114 |
| 0.5027                                                                                                   | 1.18224 | 1532 | 21.57  | 1.453 | 6.768  | 34816  | -28.060 | -0.0115 |
| 0.6092                                                                                                   | 1.21267 | 1551 | 28.28  | 1.443 | 7.190  | 45953  | -31.576 | -0.0086 |
| 0.7001                                                                                                   | 1.23947 | 1566 | 32.30  | 1.437 | 7.030  | 48472  | -36.284 | -0.0040 |
| 0.8017                                                                                                   | 1.27238 | 1578 | 35.02  | 1.430 | 5.988  | 38103  | -43.311 | 0.0008  |
| 0.9087                                                                                                   | 1.31145 | 1592 | 45.80  | 1.422 | 3.751  | 18026  | -42.808 | 0.0061  |
| 0.9496                                                                                                   | 1.32826 | 1598 | 62.26  | 1.417 | 2.485  | 10634  | -30.266 | 0.0058  |
| 1.0000                                                                                                   | 1.35439 | 1608 | 97.37  | 1.406 | 0.000  | 00000  | 0.000   | 0.0000  |
| $T = 323.15 \text{ K}$                                                                                   |         |      |        |       |        |        |         |         |
| 0.0000                                                                                                   | 1.00167 | 1387 | 1.17   | 1.519 | 0.000  | 00000  | 0.000   | 0.0000  |
| 0.0500                                                                                                   | 1.02875 | 1399 | 1.89   | 1.512 | 0.259  | -15026 | -2.345  | -0.0007 |
| 0.0998                                                                                                   | 1.05441 | 1413 | 4.34   | 1.505 | 0.429  | -20912 | -2.955  | -0.0020 |
| 0.2001                                                                                                   | 1.09368 | 1436 | 6.00   | 1.489 | 1.680  | -16766 | -7.439  | -0.0060 |
| 0.3030                                                                                                   | 1.12380 | 1458 | 8.01   | 1.474 | 3.567  | -4602  | -11.747 | -0.0090 |
| 0.4001                                                                                                   | 1.14869 | 1479 | 11.57  | 1.462 | 5.303  | 13911  | -14.135 | -0.0103 |
| 0.5027                                                                                                   | 1.17348 | 1499 | 15.22  | 1.450 | 6.879  | 29139  | -16.786 | -0.0103 |
| 0.6092                                                                                                   | 1.20390 | 1521 | 20.06  | 1.441 | 7.316  | 38828  | -18.469 | -0.0076 |
| 0.7001                                                                                                   | 1.23071 | 1537 | 23.24  | 1.435 | 7.161  | 40828  | -20.872 | -0.0027 |
| 0.8017                                                                                                   | 1.26362 | 1549 | 26.47  | 1.428 | 6.115  | 30012  | -23.865 | 0.0022  |
| 0.9087                                                                                                   | 1.30280 | 1564 | 30.22  | 1.421 | 3.843  | 15242  | -26.686 | 0.0070  |
| 0.9496                                                                                                   | 1.31960 | 1571 | 40.99  | 1.416 | 2.566  | 8641   | -18.418 | 0.0067  |
| 1.0000                                                                                                   | 1.3460  | 1585 | 62.50  | 1.403 | 0.000  | 0000   | 0.000   | 0.0000  |
| $T = 333.15 \text{ K}$                                                                                   |         |      |        |       |        |        |         |         |
| 0.0000                                                                                                   | 0.99281 | 1352 | 1.09   | 1.514 | 0.000  | 0      | 0.000   | 0.0000  |
| 0.0500                                                                                                   | 1.01989 | 1364 | 1.62   | 1.508 | 0.261  | -16190 | -1.529  | -0.0005 |
| 0.0998                                                                                                   | 1.04555 | 1378 | 3.48   | 1.501 | 0.433  | -23180 | -1.726  | -0.0016 |
| 0.2001                                                                                                   | 1.08482 | 1400 | 4.67   | 1.486 | 1.706  | -25118 | -4.667  | -0.0049 |
| 0.3030                                                                                                   | 1.11494 | 1424 | 8.28   | 1.471 | 3.629  | -13124 | -5.290  | -0.0085 |
| 0.4001                                                                                                   | 1.13983 | 1446 | 9.34   | 1.459 | 5.398  | 4726   | -8.229  | -0.0094 |
| 0.5027                                                                                                   | 1.16462 | 1467 | 10.24  | 1.447 | 7.007  | 21141  | -11.559 | -0.0093 |
| 0.6092                                                                                                   | 1.19504 | 1490 | 14.21  | 1.438 | 7.461  | 34028  | -11.975 | -0.0066 |
| 0.7001                                                                                                   | 1.22185 | 1506 | 17.72  | 1.433 | 7.315  | 35279  | -12.215 | -0.0017 |
| 0.8017                                                                                                   | 1.25476 | 1522 | 18.62  | 1.426 | 6.267  | 21170  | -15.495 | 0.0036  |
| 0.9087                                                                                                   | 1.29394 | 1539 | 20.25  | 1.419 | 3.980  | 5526   | -18.281 | 0.0079  |
| 0.9496                                                                                                   | 1.31074 | 1546 | 27.58  | 1.414 | 2.691  | 932    | -12.633 | 0.0074  |
| 1.0000                                                                                                   | 1.33785 | 1563 | 42.29  | 1.400 | 0.000  | 0      | 0.000   | 0.0000  |
| {[EMIM] <sup>+</sup> [BF <sub>4</sub> ] <sup>-</sup> (x <sub>1</sub> ) + acetophenone (x <sub>2</sub> )} |         |      |        |       |        |        |         |         |
| $T = 293.15 \text{ K}$                                                                                   |         |      |        |       |        |        |         |         |
| 0.0000                                                                                                   | 1.02789 | 1497 | 1.91   | 1.533 | 0.000  | 0000   | 0.000   | 0.0000  |
| 0.0502                                                                                                   | 1.04770 | 1509 | 2.45   | 1.527 | -0.362 | -1778  | -1.508  | -0.0002 |
| 0.1082                                                                                                   | 1.06799 | 1522 | 3.20   | 1.519 | -0.557 | -1595  | -3.122  | -0.0009 |
| 0.1993                                                                                                   | 1.09598 | 1543 | 4.74   | 1.507 | -0.579 | 8744   | -5.294  | -0.0027 |
| 0.2995                                                                                                   | 1.12005 | 1564 | 6.79   | 1.492 | -0.028 | 29049  | -7.328  | -0.0054 |

|                        |         |      |       |       |        |        |         |         |
|------------------------|---------|------|-------|-------|--------|--------|---------|---------|
| 0.4021                 | 1.13975 | 1583 | 8.73  | 1.478 | 0.918  | 50352  | -9.565  | -0.0073 |
| 0.5011                 | 1.15725 | 1598 | 12.34 | 1.466 | 1.859  | 65623  | -10.990 | -0.0076 |
| 0.5997                 | 1.17148 | 1608 | 16.03 | 1.456 | 3.043  | 73246  | -12.320 | -0.0053 |
| 0.7001                 | 1.19010 | 1618 | 19.74 | 1.449 | 3.618  | 75413  | -14.698 | -0.0011 |
| 0.8050                 | 1.21194 | 1628 | 21.73 | 1.440 | 3.779  | 70544  | -16.978 | 0.0025  |
| 0.9060                 | 1.24070 | 1638 | 25.54 | 1.429 | 2.837  | 54035  | -14.792 | 0.0035  |
| 0.9584                 | 1.26160 | 1640 | 32.13 | 1.421 | 1.560  | 27558  | -8.840  | 0.0017  |
| 1.0000                 | 1.28258 | 1642 | 42.66 | 1.414 | 0.000  | 00000  | 0.000   | 0.0000  |
| $T = 303.15 \text{ K}$ |         |      |       |       |        |        |         |         |
| 0.0000                 | 1.01917 | 1460 | 1.65  | 1.528 | 0.000  | 0000   | 0.000   | 0.0000  |
| 0.0502                 | 1.03899 | 1471 | 2.03  | 1.522 | -0.364 | -5932  | -0.950  | -0.0001 |
| 0.1082                 | 1.05924 | 1485 | 2.56  | 1.515 | -0.554 | -4524  | -1.959  | -0.0009 |
| 0.1993                 | 1.08726 | 1507 | 3.61  | 1.503 | -0.571 | 5598   | -3.327  | -0.0022 |
| 0.2995                 | 1.10756 | 1528 | 4.97  | 1.488 | 0.440  | 26682  | -4.622  | -0.0051 |
| 0.4021                 | 1.12727 | 1546 | 6.53  | 1.474 | 1.422  | 44043  | -5.782  | -0.0069 |
| 0.5011                 | 1.14476 | 1561 | 8.85  | 1.463 | 2.398  | 55531  | -7.096  | -0.0067 |
| 0.5997                 | 1.15899 | 1571 | 11.03 | 1.454 | 3.624  | 59406  | -7.524  | -0.0047 |
| 0.7001                 | 1.17762 | 1581 | 12.90 | 1.446 | 4.229  | 57428  | -8.313  | 0.0000  |
| 0.8050                 | 1.19946 | 1591 | 14.27 | 1.437 | 4.412  | 48875  | -9.727  | 0.0028  |
| 0.9060                 | 1.22821 | 1601 | 16.90 | 1.426 | 3.470  | 29125  | -8.783  | 0.0040  |
| 0.9584                 | 1.24911 | 1608 | 21.22 | 1.419 | 2.178  | 14173  | -5.846  | 0.0022  |
| 1.0000                 | 1.27496 | 1618 | 28.17 | 1.412 | 0.000  | 00000  | 0.000   | 0.0000  |
| $T = 313.15 \text{ K}$ |         |      |       |       |        |        |         |         |
| 0.0000                 | 1.01043 | 1423 | 1.37  | 1.523 | 0.000  | 0000   | 0.000   | 0.0000  |
| 0.0502                 | 1.03025 | 1435 | 1.68  | 1.518 | -0.366 | -7132  | -0.634  | 0.0000  |
| 0.1082                 | 1.05050 | 1449 | 2.09  | 1.510 | -0.554 | -7349  | -1.307  | -0.0006 |
| 0.1993                 | 1.07852 | 1472 | 3.09  | 1.498 | -0.560 | 2677   | -2.007  | -0.0023 |
| 0.2995                 | 1.09882 | 1491 | 3.84  | 1.484 | 0.479  | 17413  | -3.125  | -0.0048 |
| 0.4021                 | 1.11853 | 1511 | 5.23  | 1.471 | 1.490  | 33796  | -3.650  | -0.0065 |
| 0.5011                 | 1.13602 | 1527 | 6.02  | 1.460 | 2.496  | 46316  | -4.717  | -0.0060 |
| 0.5997                 | 1.15025 | 1538 | 8.15  | 1.451 | 3.755  | 50140  | -5.421  | -0.0040 |
| 0.7001                 | 1.16888 | 1550 | 9.45  | 1.443 | 4.385  | 47844  | -6.001  | 0.0000  |
| 0.8050                 | 1.19072 | 1560 | 10.91 | 1.435 | 4.588  | 35788  | -6.495  | 0.0034  |
| 0.9060                 | 1.21947 | 1572 | 12.35 | 1.424 | 3.649  | 18108  | -5.949  | 0.0043  |
| 0.9584                 | 1.24037 | 1581 | 15.35 | 1.416 | 2.349  | 8447   | -3.921  | 0.0027  |
| 1.0000                 | 1.26742 | 1595 | 20.05 | 1.409 | 0.000  | 0000   | 0.000   | 0.0000  |
| $T = 323.15 \text{ K}$ |         |      |       |       |        |        |         |         |
| 0.0000                 | 1.00167 | 1387 | 1.17  | 1.519 | 0.000  | 00000  | 0.000   | 0.0000  |
| 0.0502                 | 1.02149 | 1398 | 1.42  | 1.513 | -0.368 | -11030 | -0.438  | -0.0001 |
| 0.1082                 | 1.04174 | 1413 | 1.76  | 1.506 | -0.552 | -10086 | -0.900  | -0.0002 |
| 0.1993                 | 1.06976 | 1437 | 2.36  | 1.495 | -0.547 | 510    | -1.550  | -0.0016 |
| 0.2995                 | 1.09006 | 1457 | 3.10  | 1.481 | 0.522  | 13762  | -2.189  | -0.0043 |
| 0.4021                 | 1.10976 | 1477 | 4.14  | 1.468 | 1.565  | 26509  | -2.563  | -0.0058 |
| 0.5011                 | 1.12726 | 1493 | 4.73  | 1.457 | 2.602  | 36049  | -3.334  | -0.0056 |
| 0.5997                 | 1.14149 | 1506 | 6.29  | 1.448 | 3.897  | 41162  | -4.129  | -0.0034 |
| 0.7001                 | 1.16012 | 1519 | 7.25  | 1.441 | 4.553  | 37638  | -4.551  | 0.0005  |
| 0.8050                 | 1.18195 | 1530 | 8.09  | 1.432 | 4.777  | 27378  | -5.158  | 0.0041  |
| 0.9060                 | 1.21071 | 1544 | 9.43  | 1.422 | 3.844  | 11686  | -4.210  | 0.0048  |
| 0.9584                 | 1.23161 | 1555 | 11.61 | 1.414 | 2.534  | 3851   | -2.748  | 0.0031  |
| 1.0000                 | 1.25995 | 1572 | 14.93 | 1.407 | 0.000  | 0000   | 0.000   | 0.0000  |
| $T = 333.15 \text{ K}$ |         |      |       |       |        |        |         |         |
| 0.0000                 | 0.99281 | 1352 | 1.09  | 1.514 | 0.000  | 00000  | 0.000   | 0.0000  |
| 0.0502                 | 1.01263 | 1363 | 1.23  | 1.508 | -0.368 | -12069 | -0.382  | 0.0003  |
| 0.1082                 | 1.03288 | 1377 | 1.52  | 1.502 | -0.548 | -15315 | -0.701  | 0.0000  |
| 0.1993                 | 1.06090 | 1400 | 2.00  | 1.490 | -0.531 | -9986  | -1.168  | -0.0017 |
| 0.2995                 | 1.08119 | 1422 | 2.58  | 1.477 | 0.573  | 4959   | -1.636  | -0.0041 |
| 0.4021                 | 1.10090 | 1442 | 3.39  | 1.464 | 1.650  | 17186  | -1.897  | -0.0053 |
| 0.5011                 | 1.11840 | 1462 | 3.49  | 1.454 | 2.721  | 31524  | -1.837  | -0.0052 |

|        |         |      |       |       |       |       |        |         |
|--------|---------|------|-------|-------|-------|-------|--------|---------|
| 0.5997 | 1.13262 | 1476 | 5.03  | 1.446 | 4.055 | 36738 | -2.321 | -0.0025 |
| 0.7001 | 1.15125 | 1490 | 5.77  | 1.438 | 4.740 | 34074 | -2.333 | 0.0009  |
| 0.8050 | 1.17049 | 1502 | 7.18  | 1.430 | 5.335 | 24021 | -2.320 | 0.0046  |
| 0.9060 | 1.20185 | 1520 | 7.45  | 1.419 | 4.063 | 10935 | -2.100 | 0.0050  |
| 0.9584 | 1.22275 | 1531 | 9.09  | 1.412 | 2.746 | 2059  | -1.009 | 0.0034  |
| 1.0000 | 1.25254 | 1550 | 11.53 | 1.404 | 0.000 | 0000  | 0.000  | 0.0000  |

{[EMIM]<sup>+</sup>[EtSO<sub>4</sub>]<sup>-</sup> (x<sub>1</sub>) + acetophenone (x<sub>2</sub>)}

T = 293.15 K

|        |         |      |       |       |        |        |         |         |
|--------|---------|------|-------|-------|--------|--------|---------|---------|
| 0.0000 | 1.02789 | 1497 | 1.91  | 1.533 | 0.000  | 0000   | 0.000   | 0.0000  |
| 0.0498 | 1.04541 | 1511 | 3.04  | 1.531 | -0.118 | -1526  | -3.648  | 0.0012  |
| 0.1001 | 1.06234 | 1526 | 3.67  | 1.528 | -0.250 | -2902  | -7.856  | 0.0008  |
| 0.2027 | 1.09354 | 1552 | 4.30  | 1.521 | -0.480 | -5298  | -17.085 | -0.0017 |
| 0.3079 | 1.12399 | 1577 | 6.86  | 1.513 | -0.948 | -10686 | -24.622 | -0.0036 |
| 0.4001 | 1.14798 | 1596 | 10.10 | 1.507 | -1.337 | -15968 | -30.246 | -0.0044 |
| 0.4994 | 1.16990 | 1615 | 14.88 | 1.502 | -1.543 | -18696 | -34.988 | -0.0047 |
| 0.5998 | 1.18857 | 1634 | 22.57 | 1.497 | -1.549 | -17308 | -36.946 | -0.0045 |
| 0.6992 | 1.20158 | 1652 | 30.24 | 1.493 | -1.020 | -6170  | -38.825 | -0.0033 |
| 0.8000 | 1.21009 | 1669 | 40.28 | 1.490 | 0.021  | 8983   | -38.463 | -0.0008 |
| 0.9003 | 1.21901 | 1684 | 55.87 | 1.487 | 0.593  | 19803  | -32.511 | 0.0016  |
| 0.9495 | 1.22777 | 1691 | 68.31 | 1.485 | 0.573  | 16503  | -24.804 | 0.0019  |
| 1.0000 | 1.23816 | 1695 | 97.96 | 1.480 | 0.000  | 00000  | 0.000   | 0.0000  |

T = 303.15 K

|        |         |      |       |       |        |        |         |         |
|--------|---------|------|-------|-------|--------|--------|---------|---------|
| 0.0000 | 1.01917 | 1460 | 1.65  | 1.528 | 0.000  | 0000   | 0.000   | 0.0000  |
| 0.0498 | 1.03670 | 1474 | 2.48  | 1.527 | -0.101 | -2741  | -2.081  | 0.0014  |
| 0.1001 | 1.05363 | 1489 | 2.88  | 1.524 | -0.231 | -4453  | -4.633  | 0.0011  |
| 0.2027 | 1.08483 | 1516 | 5.31  | 1.517 | -0.437 | -7745  | -8.211  | -0.0013 |
| 0.3079 | 1.11528 | 1542 | 6.60  | 1.509 | -0.885 | -13120 | -13.082 | -0.0031 |
| 0.4001 | 1.13927 | 1562 | 8.39  | 1.504 | -1.254 | -18287 | -16.686 | -0.0042 |
| 0.4994 | 1.16119 | 1583 | 11.85 | 1.499 | -1.434 | -21297 | -19.034 | -0.0043 |
| 0.5998 | 1.17986 | 1602 | 16.37 | 1.494 | -1.410 | -20406 | -20.395 | -0.0042 |
| 0.6992 | 1.19269 | 1621 | 21.33 | 1.490 | -0.818 | -9653  | -21.263 | -0.0028 |
| 0.8000 | 1.20138 | 1640 | 27.09 | 1.487 | 0.244  | 6992   | -21.403 | -0.0005 |
| 0.9003 | 1.21030 | 1656 | 35.33 | 1.484 | 1.137  | 17007  | -19.027 | 0.0017  |
| 0.9495 | 1.21906 | 1663 | 43.94 | 1.482 | 0.850  | 12129  | -13.308 | 0.0022  |
| 1.0000 | 1.23127 | 1670 | 60.20 | 1.478 | 0.000  | 00000  | 0.000   | 0.0000  |

T = 313.15 K

|        |         |      |       |       |        |        |         |         |
|--------|---------|------|-------|-------|--------|--------|---------|---------|
| 0.0000 | 1.01043 | 1423 | 1.37  | 1.523 | 0.000  | 0000   | 0.000   | 0.0000  |
| 0.0498 | 1.02796 | 1438 | 2.00  | 1.523 | -0.090 | -3650  | -1.292  | 0.0016  |
| 0.1001 | 1.04489 | 1453 | 3.32  | 1.520 | -0.209 | -4951  | -1.905  | 0.0014  |
| 0.2027 | 1.07609 | 1481 | 4.64  | 1.513 | -0.391 | -10023 | -4.530  | -0.0009 |
| 0.3079 | 1.10654 | 1507 | 5.65  | 1.506 | -0.815 | -15624 | -7.572  | -0.0028 |
| 0.4001 | 1.13053 | 1529 | 7.20  | 1.500 | -1.162 | -20686 | -9.570  | -0.0039 |
| 0.4994 | 1.15245 | 1550 | 9.80  | 1.495 | -1.314 | -23976 | -10.786 | -0.0042 |
| 0.5998 | 1.17112 | 1571 | 11.89 | 1.491 | -1.258 | -23569 | -12.564 | -0.0037 |
| 0.6992 | 1.18413 | 1591 | 14.50 | 1.487 | -0.651 | -13852 | -13.786 | -0.0025 |
| 0.8000 | 1.19264 | 1610 | 17.96 | 1.484 | 0.486  | 2769   | -14.197 | -0.0001 |
| 0.9003 | 1.20156 | 1628 | 23.95 | 1.482 | 1.425  | 14179  | -12.064 | 0.0019  |
| 0.9495 | 1.21032 | 1637 | 28.98 | 1.479 | 1.150  | 11416  | -8.933  | 0.0020  |
| 1.0000 | 1.22446 | 1646 | 39.86 | 1.475 | 0.000  | 0000   | 0.000   | 0.0000  |

T = 323.15 K

|        |         |      |      |       |        |        |        |         |
|--------|---------|------|------|-------|--------|--------|--------|---------|
| 0.0000 | 1.00167 | 1387 | 1.17 | 1.519 | 0.000  | 0000   | 0.000  | 0.0000  |
| 0.0498 | 1.01919 | 1402 | 1.68 | 1.518 | -0.079 | -5093  | -0.815 | 0.0017  |
| 0.1001 | 1.03613 | 1417 | 1.94 | 1.516 | -0.186 | -7376  | -1.907 | 0.0018  |
| 0.2027 | 1.06733 | 1446 | 2.19 | 1.509 | -0.341 | -10766 | -4.394 | -0.0004 |
| 0.3079 | 1.09778 | 1473 | 3.41 | 1.502 | -0.740 | -18122 | -5.977 | -0.0024 |
| 0.4001 | 1.12177 | 1496 | 5.80 | 1.497 | -1.064 | -23095 | -6.053 | -0.0034 |
| 0.4994 | 1.14368 | 1518 | 7.99 | 1.492 | -1.186 | -26664 | -6.515 | -0.0038 |

|                     |         |      |       |       |        |        |        |         |
|---------------------|---------|------|-------|-------|--------|--------|--------|---------|
| 0.5998              | 1.16236 | 1540 | 9.33  | 1.487 | -1.095 | -26730 | -7.853 | -0.0033 |
| 0.6992              | 1.17537 | 1561 | 10.72 | 1.484 | -0.445 | -17691 | -9.125 | -0.0021 |
| 0.8000              | 1.18387 | 1581 | 13.12 | 1.482 | 0.743  | -2477  | -9.416 | 0.0001  |
| 0.9003              | 1.19279 | 1601 | 17.14 | 1.479 | 1.731  | 11389  | -8.075 | 0.0021  |
| 0.9495              | 1.20156 | 1611 | 20.59 | 1.477 | 1.469  | 8840   | -5.940 | 0.0021  |
| 1.0000              | 1.21770 | 1623 | 27.88 | 1.472 | 0.000  | 0000   | 0.000  | 0.0000  |
| <i>T</i> = 333.15 K |         |      |       |       |        |        |        |         |
| 0.0000              | 0.99281 | 1352 | 1.02  | 1.514 | 0.000  | 0000   | 0.000  | 0.0000  |
| 0.0498              | 1.01033 | 1365 | 1.46  | 1.514 | -0.066 | -6382  | -0.522 | 0.0021  |
| 0.1001              | 1.02727 | 1379 | 1.66  | 1.511 | -0.159 | -7237  | -1.298 | 0.0020  |
| 0.2027              | 1.05847 | 1404 | 1.86  | 1.505 | -0.285 | -11938 | -3.084 | -0.0002 |
| 0.3079              | 1.08892 | 1428 | 3.57  | 1.498 | -0.656 | -19682 | -3.402 | -0.0021 |
| 0.4001              | 1.11291 | 1448 | 4.86  | 1.493 | -0.952 | -25076 | -3.893 | -0.0034 |
| 0.4994              | 1.13482 | 1467 | 6.76  | 1.488 | -1.041 | -28632 | -3.915 | -0.0035 |
| 0.5998              | 1.15350 | 1485 | 8.27  | 1.484 | -0.913 | -28786 | -4.353 | -0.0029 |
| 0.6992              | 1.16650 | 1503 | 9.62  | 1.481 | -0.216 | -20419 | -4.919 | -0.0017 |
| 0.8000              | 1.17501 | 1521 | 11.90 | 1.479 | 1.028  | -6237  | -4.595 | 0.0003  |
| 0.9003              | 1.18393 | 1538 | 14.22 | 1.476 | 2.068  | 6566   | -4.212 | 0.0023  |
| 0.9495              | 1.19265 | 1548 | 16.22 | 1.474 | 1.828  | 8817   | -3.165 | 0.0023  |
| 1.0000              | 1.21100 | 1560 | 20.36 | 1.470 | 0.000  | 0000   | 0.000  | 0.0000  |

---
